# Supplementary material
Source: PubMed Central journal article supplement (PMC2872443)
Supplement: 0914930107_pnas.200914930SI.pdf [file 0914930107_pnas.200914930SI.pdf]

# Supporting Information

Ying et al. 10.1073/pnas.0914930107

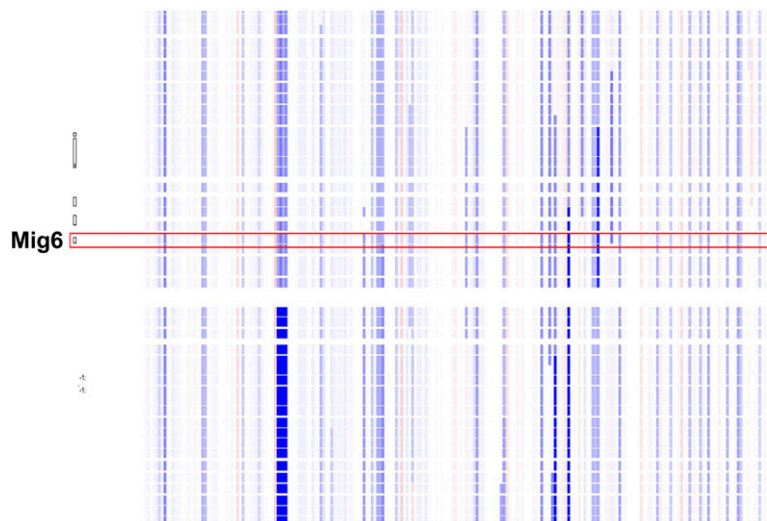

**Fig. S1.** Deletion of Mig-6 in TCGA dataset. Array-CGH heat map details Mig-6 deletion at chromosome 1p36 in TCGA dataset. Regions of genomic amplification and deletion are denoted in red and blue, respectively.

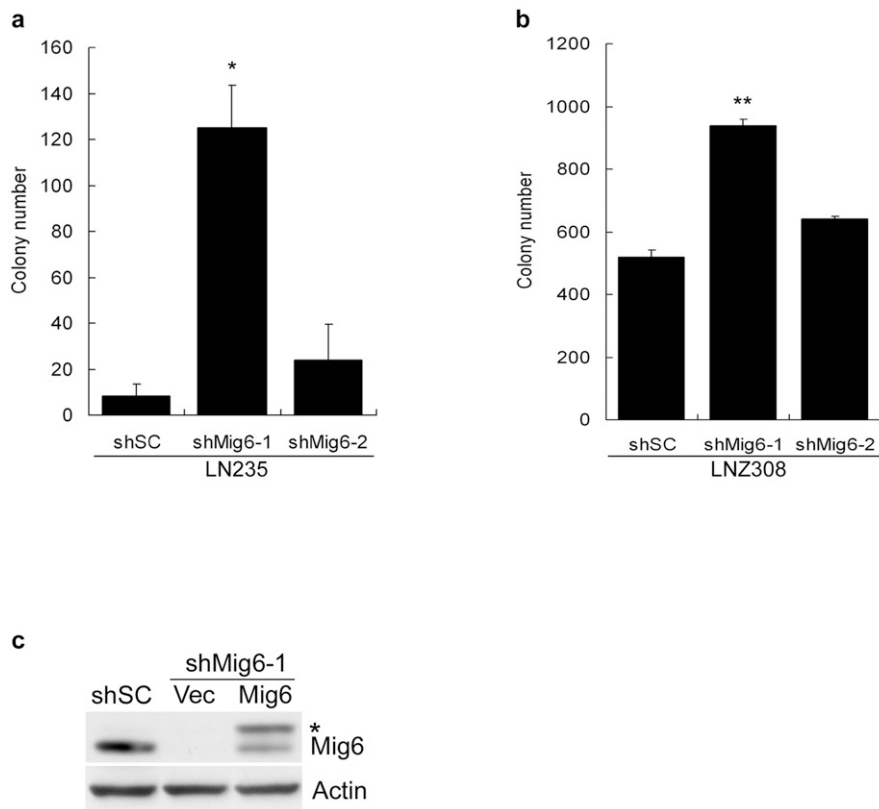

**Fig. 52.** Knocking down of Mig-6 promotes anchorage-independent growth. Knocking down of Mig-6 expression in (A) LN235 and (B) LNZ308 cells promotes anchorage-independent growth in soft agar. Error bars indicate  $\pm$ SD (\*,  $P = 0.013$ ; \*\*,  $P = 0.003$ ;  $n = 3$ ). (C) Mig-6 expression was reconstituted in U87 cells expressing shRNA against Mig-6. \*, HA-tagged Mig-6.

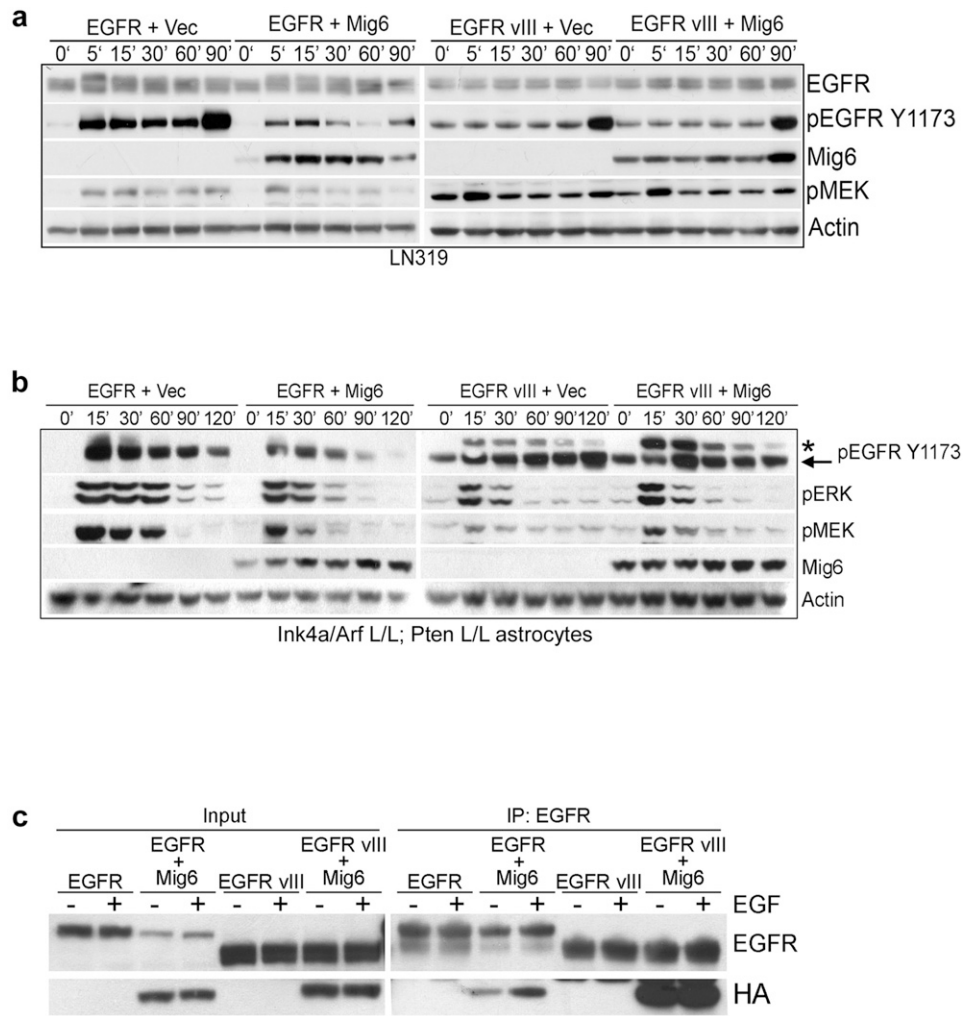

**Fig. S3.** Mig-6 fails to regulate EGFRvIII activation and downstream signaling. Ectopic expression of HA-tagged Mig-6 in (A) LN319 cells and (B) murine *INK<sup>-/-</sup>; Pten<sup>-/-</sup>* astrocytes stably expressing EGFRvIII shows no effect on EGFR phosphorylation or activation of downstream signaling pathways, whereas expression of Mig-6 in cells with wild-type EGFR inhibits EGFR activation and downstream signaling induced by EGF treatment. \*, endogenous EGFR; arrow, EGFRvIII. (C) Mig-6 binds with EGFRvIII and the interaction is not regulated by EGF stimulation. Murine *INK<sup>-/-</sup>; Pten<sup>-/-</sup>* astrocytes expressing HA-tagged Mig-6 together with wild-type or vIII forms of EGFR were treated with EGF (20 ng/mL) for 30 min. Cell lysates were subjected to IP with human-specific anti-EGFR antibody and immunoblotted with the indicated antibodies.



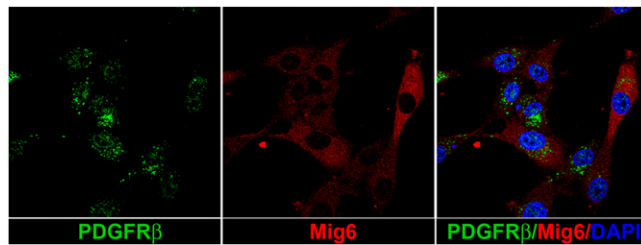

**Fig. S6.** Mig-6 does not colocalize with PDGFR $\beta$  in vesicle structures. U87 cells were treated with PDGF-BB (10 ng/mL) for 30 min and subjected to immunofluorescence staining with anti-PDGFR $\beta$  (green), anti-Mig-6 (red), and DAPI (blue).

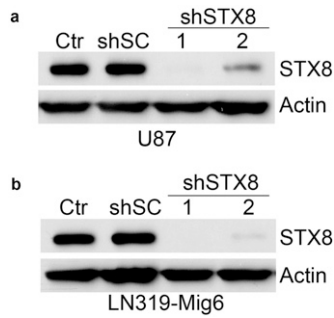

**Fig. S7.** Depletion of STX8 expression by shRNA. STX8 expression in (A) U87 and (B) LN319-Mig-6 cells was knocked down by two independent shRNAs (shSTX8-1 and shSTX8-2).

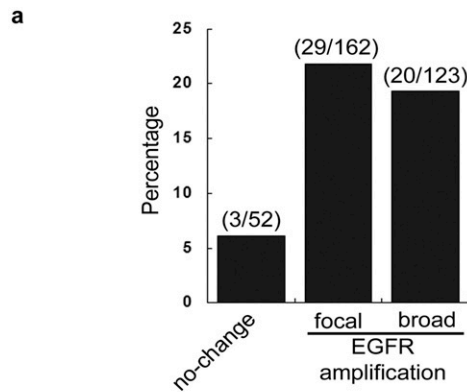

**b**

|                    | EGFR vIII | EGFR others |                |
|--------------------|-----------|-------------|----------------|
| Mig6 deletion/loss | 9         | 24          |                |
| No Mig6 change     | 10        | 112         |                |
| Percentage         | 47%       | 18%         | <b>p=0.006</b> |

**Fig. S8.** Genetic correlation between Mig-6 and EGFR in human GBM samples. (A) Incidence of Mig-6 deletion/loss in three groups of samples with different EGFR status. Numbers are presented as number of samples with Mig-6 deletion/loss over total sample numbers in each group. (B) Incidence of Mig-6 deletion/loss and EGFRVIII mutation in samples with EGFR focal amplification.

**Table S1. Summary of yeast two-hybrid interactors**

| Gene                    | Description                                                                              | Gene ID |
|-------------------------|------------------------------------------------------------------------------------------|---------|
| <i>ACBD3</i>            | Acyl-CoA binding domain containing 3                                                     | 64746   |
| <i>AOX1</i>             | Aldehyde oxidase 1                                                                       | 316     |
| <i>ARRDC5</i>           | Arrestin domain containing 5                                                             | 645432  |
| <i>C13orf18</i>         | Chromosome 13 ORF 18                                                                     | 80183   |
| <i>CRHBP</i>            | Corticotropin releasing hormone binding protein                                          | 1393    |
| <b><i>DCTN6</i></b>     | Dynactin 6                                                                               | 10671   |
| <b><i>EFEMP1</i></b>    | EGF-containing fibulin-like extracellular matrix protein 1                               | 2202    |
| <b><i>FAM96B</i></b>    | Family with sequence similarity 96, member B                                             | 51647   |
| <b><i>GAS1</i></b>      | Growth arrest-specific 1                                                                 | 2619    |
| <i>GNPDA2</i>           | Glucosamine-6-phosphate deaminase 2                                                      | 132789  |
| <i>GRB2</i>             | Growth factor receptor-bound protein 2                                                   | 2885    |
| <i>GTF2H2</i>           | General transcription factor IIH, polypeptide 2                                          | 2966    |
| <i>HNRPA3</i>           | Heterogeneous nuclear ribonucleoprotein A3                                               | 220988  |
| <i>HYDIN</i>            | Hydrocephalus inducing homolog                                                           | 54768   |
| <i>IL2RG</i>            | Interleukin 2 receptor, gamma                                                            | 3561    |
| <b><i>JAB1</i></b>      | <i>Homo sapiens</i> mRNA for COP9 signalosome subunit 5 variant protein                  | 10987   |
| <b><i>LOC401397</i></b> | Hypothetical LOC401397                                                                   | 401397  |
| <i>MFSD5</i>            | Major facilitator superfamily domain containing 5                                        | 84975   |
| <i>MMP26</i>            | MMP26 matrix metalloproteinase 26                                                        | 56547   |
| <i>NEU1</i>             | Sialidase 1 (lysosomal sialidase)                                                        | 4758    |
| <b><i>NPC2</i></b>      | Niemann–Pick disease, type C2                                                            | 10577   |
| <i>OSTF1</i>            | Osteoclast stimulating factor 1                                                          | 26578   |
| <i>PAPSS1</i>           | 3'-Phosphoadenosine 5'-phosphosulfate synthase 1                                         | 9061    |
| <b><i>PCCA</i></b>      | Propionyl CoA carboxylase, alpha polypeptide                                             | 5095    |
| <i>PCNA</i>             | Proliferating cell nuclear antigen                                                       | 5111    |
| <b><i>PCD2</i></b>      | Programmed cell death 2 isoform 1                                                        | 5134    |
| <i>PHYHIP1</i>          | Phytanoyl-CoA 2-hydroxylase interacting protein-like                                     | 84457   |
| <i>PLEKHA3</i>          | Pleckstrin homology domain containing, family A                                          | 65977   |
| <i>PPIA</i>             | Peptidylprolyl isomerase A (cyclophilin A)                                               | 5478    |
| <i>PSMA7</i>            | Proteasome (prosome, macropain) subunit, alpha type, 7                                   | 5688    |
| <i>PSMB6</i>            | Proteasome (prosome, macropain) subunit, beta type, 6                                    | 5694    |
| <i>RAB18</i>            | RAB18, member RAS oncogene family                                                        | 22931   |
| <b><i>SH3YL1</i></b>    | SH3 domain containing, Ysc84-like 1                                                      | 26751   |
| <b><i>SLC7A13</i></b>   | Solute carrier family 7                                                                  | 157724  |
| <b><i>STX8</i></b>      | Syntaxin 8                                                                               | 9482    |
| <i>TC2N</i>             | TC2N tandem C2 domains, nuclear                                                          | 123036  |
| <i>TIMP4</i>            | Tissue inhibitor of metalloproteinase 4                                                  | 7079    |
| <i>TM2D3</i>            | TM2 domain containing 3                                                                  | 80213   |
| <i>TMDC11</i>           | ADAM metalloproteinase domain 5 pseudogene                                               | 255926  |
| <i>TMEM165</i>          | Transmembrane protein 165                                                                | 55858   |
| <i>TMEM59</i>           | Transmembrane protein 59                                                                 | 9528    |
| <b><i>WDR61</i></b>     | WD repeat domain 61                                                                      | 80349   |
| <b><i>YWHAB</i></b>     | Tyrosine 3-monooxygenase/tryptophan 5-monooxygenase activation protein, beta polypeptide | 7529    |
| <i>ZPBP</i>             | Zona pellucida binding protein                                                           | 11055   |

Interactors identified two times or more are shown in bold.
